# Supplementary material for: Improving Accurate Blood Pressure Cuff Allocation in Patients with Obesity: A Quality Improvement Initiative
Source: MDPI journal article supplement (doi:10.3390/healthcare9030323), 2021-03-13

S2. These were shown both sides of a laminated card for distribution in clinical areas.

| Range (cm) | Size                   |
|------------|------------------------|
| 25 – 34    | ADULT LONG 11L         |
| 32 – 43    | LARGE ADULT LONG 12L   |
| 40 – 55    | THIGH 13 (USED ON ARM) |

1. Measure arm length from the top of the shoulder to the tip of the elbow
2. At the halfway point of the arm length, measure the mid-arm circumference
3. Select the cuff using your measurement
4. Document measurement in chart

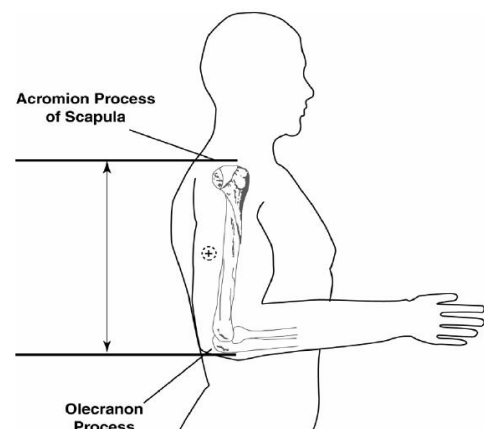

Supplement: s1 [file s1]
